# Supplementary material
Source: MDPI journal article supplement (https://www.mdpi.com/2311-553X/9/3/32)
Supplement: s1 [file s1]

**Table S2.** Mutations with documented activity relevant to cancer in MDA-MB-231 cells. Selected mutations by Census tiers 1 from COSMIC (<https://cancer.sanger.ac.uk/cosmic>).

| Gene symbol | Gene Name                                                | AA mutation             | CDS mutation                 | Type                    |
|-------------|----------------------------------------------------------|-------------------------|------------------------------|-------------------------|
| BRAF        | B-Raf proto-oncogene, serine/threonine kinase            | <a href="#">p.G464V</a> | <a href="#">c.1391G&gt;T</a> | Substitution - Missense |
| CD79A       | CD79a molecule                                           | <a href="#">p.C106Y</a> | <a href="#">c.317G&gt;A</a>  | Substitution - Missense |
| CRTC3       | CREB regulated transcription coactivator 3               | <a href="#">p.P578A</a> | <a href="#">c.1732C&gt;G</a> | Substitution - Missense |
| NF2         | NF2, moesin-ezrin-radixin like (MERLIN) tumor suppressor | <a href="#">p.E231*</a> | <a href="#">c.691G&gt;T</a>  | Substitution - Nonsense |
| PDGFRA      | Platelet derived growth factor receptor alpha            | <a href="#">p.Y172F</a> | <a href="#">c.515A&gt;T</a>  | Substitution - Missense |
| TP53        | Tumor protein p53                                        | <a href="#">p.R280K</a> | <a href="#">c.839G&gt;A</a>  | Substitution - Missense |
