# Supplementary material
Source: MDPI journal article supplement (https://www.mdpi.com/2311-553X/9/3/32)
Supplement: s1 [file s1]

**Table S3.** Primers used to amplify circular and linear RNAs.

| Type of RNA  | Gene name | Forward primer                | Reverse primer                  | Melting temperature | Reference                           |
|--------------|-----------|-------------------------------|---------------------------------|---------------------|-------------------------------------|
| Housekeeping | GAPDH     | 5'-CTATAAATTGAGCCCGCAGCC-3'   | 5'-CCCAATACGACCAAATCCGT-3'      | 60°C                | Gorji-Bahri et al. 2021 [50]        |
| circular     | 000911    | 5'-AAAAGCAAGCAGTGCCCAT-3'     | 5'-GCTCGAATCAGGTCCACCA-3'       | 60°C                | Wang et al. 2018 [18]               |
| circular     | VRK1      | 5'-GAACCTGGTGTGAAGATACGG-3'   | 5'-AATCCTACTTTCCATTCTTTTTTG-3'  | 60°C                | Yan et al. 2017 [17]                |
| circular     | BCL11B    | 5'-ACGAAAGGCATCTGTCCCAA-3'    | 5'-TTGTGCTCTATAAAAACCAGGATGT-3' | 60°C                | Yan et al. 2017 [17]                |
| circular     | GFRA1     | 5'-CCTCCGGGTAAAGAACAAGC-3'    | 5'-CTGGCTGGCAGTTGGTAAAA-3'      | 60°C                | He et al. 2017 [21]                 |
| circular     | IGF1R     | 5'-AGCCGATGTGTGAGAAGACC-3'    | 5'-CAGCTGCTGATAGTCGTTGC-3'      | 60°C                | Coscujuela Tarrero et al. 2018 [14] |
| circular     | ESR1      | 5'-CAACCAGTGCACCATTGATA-3'    | 5'-TCCTTGGCAGATTCCATAG-3'       | 60°C                | Coscujuela Tarrero et al. 2018 [14] |
| circular     | HIPK3     | 5'-GGCAGCCTTACAGGGTTAA-3'     | 5'-GGGTAGACCAAGACTTGTGAG-3'     | 60°C                | Coscujuela Tarrero et al. 2018 [14] |
| circular     | NCOA3     | 5'-GCCTGGCTTTGAAGATATAATC-3'  | 5'-TCAGCTCAGCCAATTCTTC-3'       | 60°C                | Coscujuela Tarrero et al. 2018 [14] |
| circular     | MAN1A2    | 5'-TCTGTGTTTGAAGTCAACATTCG-3' | 5'-GCTTCTTCCAAGGCCTTCTC-3'      | 60°C                | Coscujuela Tarrero et al. 2018 [14] |
| circular     | AKT2      | 5'-GCCCCTGATCAGACTCTACC-3'    | 5'-CAGGGCACAGTCTCTCGTC-3'       | 62°C                | Vo et al. 2019 [19]                 |
| circular     | AKT3      | 5'-GCAAAGGATGAAGTGGCACA-3'    | 5'-TGATGACTCAGCCTCGCC-3'        | 60 °C               | Vo et al. 2019 [19]                 |
| circular     | PIK3CB    | 5'-CTGGTTTGGATCTTCGGTTGA-3'   | 5'-TCCCGGTAAGCACTCTGTTT-3'      | 60°C                | Vo et al. 2019 [19]                 |
| linear       | SNX27     | 5'-GAGCAGGCGAGAAGGAATTG-3'    | 5'-GCTTAGAACACAGCTGCCTC-3'      | 60°C                | Lee 2016 et al. [51]                |
| linear       | VRK1      | 5'-CTACCAACGAGCTGCAAAACC-3'   | 5'-TCACTCCCAAAGCGATCCATTA-3'    | 60°C                | Li 2017 et al. [52]                 |
| linear       | BCL11B    | 5'-TGCCAGTGTGAGTTGTCAGG-3'    | 5'-CCAGGTAGATGCGGAAGC-3'        | 60°C                | Permatasari 2017 <i>et al.</i> [53] |
| linear       | GFRA1     | 5'-CCAAAGGGAACAACCTGCCTG-3'   | 5'-CGGTTGCAGACATCGTTGGA-3'      | 60°C                | He et al. 2017 [21]                 |

|        |        |                             |                            |        |                                              |
|--------|--------|-----------------------------|----------------------------|--------|----------------------------------------------|
| linear | IGF1R  | 5'-ACGAGTGGAGAAATCTGCGG-3'  | 5'-ATGTGGAGGTAGCCCTCGAT-3' | 60°C   | Coscujuela<br>Tarrero et<br>al. 2018<br>[14] |
| linear | ESR1   | 5'-GACAGGGAGCTGGTTCACAT-3'  | 5'-CCAGACGAGACCAATCATCA-3' | 60°C   | Coscujuela<br>Tarrero et<br>al. 2018<br>[14] |
| linear | HIPK3  | 5'-TGGAGACTGGGGGAAGATGA-3'  | 5'-CACACTAACTGGCTGAGGGG-3' | 60°C   | Liu et al.<br>2018 [54]                      |
| linear | NCOA3  | 5'-ACTTGCTGGATGGTGGACT-3'   | 5'-ACATGGCAATTTGCGTTTT-3'  | 60°C   | Coscujuela<br>Tarrero et<br>al. 2018<br>[14] |
| linear | MAN1A2 | 5'-CCGGTAAAGGGGCTAAAAAC-3'  | 5'-GCTTCTTCCAAGGCCTTCTC-3' | 60°C   | Coscujuela<br>Tarrero et<br>al. 2018<br>[14] |
| linear | AKT2   | 5'-ACAAGGAAAGGGAACCAGCG-3'  | 5'-GGTACGCTGTACCTAGCTC-3'  | 60 °C  | Vo <i>et al.</i><br>2019 [19]                |
| linear | AKT3   | 5'-GCAAAGGATGAAGTGGCACA-3'  | 5'-ACCCGCTCTCTCGACAAATG-3' | 64.5°C | Vo <i>et al.</i><br>2019 [19]                |
| linear | PIK3CB | 5'-CAGCTGAGATTGCAAGCAGTG-3' | 5'-ATCTCTCGGCAGTCTTGTCG-3' | 64.5°C | Vo <i>et al.</i><br>2019 [19]                |
