# Supplementary material
Source: MDPI journal article supplement (https://www.mdpi.com/2311-553X/9/3/32)
Supplement: s1 [file s1]

**Table S1.** Mutations with documented activity relevant to cancer in MCF-7 cells. Selected mutations by Census tiers 1 from COSMIC (<https://cancer.sanger.ac.uk/cosmic>).

| Gene symbol | Gene Name                                                              | AA mutation                    | CDS mutation                   | Type                    |
|-------------|------------------------------------------------------------------------|--------------------------------|--------------------------------|-------------------------|
| ATP2B3      | ATPase plasma membrane Ca <sup>2+</sup> transporting 3                 | <a href="#">p.V882E</a>        | <a href="#">c.2645T&gt;A</a>   | Substitution - Missense |
| EP300       | E1A binding protein p300                                               | <a href="#">p.R1356*</a>       | <a href="#">c.4066C&gt;T</a>   | Substitution - Nonsense |
| ERBB4       | Erb-b2 receptor tyrosine kinase 4                                      | <a href="#">p.Y1242C</a>       | <a href="#">c.3725A&gt;G</a>   | Substitution - Missense |
| FUS         | FUS RNA binding protein                                                | <a href="#">p.D502del</a>      | <a href="#">c.1503_1505del</a> | Deletion - In frame     |
| GATA3       | GATA binding protein 3                                                 | <a href="#">p.D336Gfs*17</a>   | <a href="#">c.1006dup</a>      | Insertion - Frameshift  |
| KMT2C       | Lysine methyltransferase 2C                                            | <a href="#">p.I3590L</a>       | <a href="#">c.10768A&gt;C</a>  | Substitution - Missense |
| LATS1       | Large tumor suppressor kinase 1                                        | <a href="#">p.D1043N</a>       | <a href="#">c.3127G&gt;A</a>   | Substitution - Missense |
| MAP3K13     | Mitogen-activated protein kinase kinase kinase 13                      | <a href="#">p.D380N</a>        | <a href="#">c.1138G&gt;A</a>   | Substitution - Missense |
| MYH9        | Myosin heavy chain 9                                                   | <a href="#">p.K682_L687del</a> | <a href="#">c.2044_2061del</a> | Deletion - In frame     |
| PIK3CA      | Phosphatidylinositol-4,5-bisphosphate 3-kinase catalytic subunit alpha | <a href="#">p.E545K</a>        | <a href="#">c.1633G&gt;A</a>   | Substitution - Missense |
